# Supplementary material for: T cell antigen discovery via signaling and antigen-presenting bifunctional receptors
Source: Springer Nature journal article supplement (doi:10.1038/s41592-018-0304-8), 2019-01-28
Supplement: MOESM1 [file 41592_2018_304_MOESM1_ESM.pdf]

In the format provided by the authors and unedited.

# T cell antigen discovery via signaling and antigen-presenting bifunctional receptors

Alok V. Joglekar <sup>1\*</sup>, Michael T. Leonard <sup>1</sup>, John D. Jeppson<sup>1</sup>, Margaret Swift<sup>1</sup>, Guideng Li <sup>1,2,3</sup>,  
Stephanie Wong<sup>1</sup>, Songming Peng<sup>4</sup>, Jesse M. Zaretsky<sup>5</sup>, James R. Heath<sup>4,6</sup>, Antoni Ribas<sup>5,6,7,8</sup>,  
Michael T. Bethune<sup>1</sup> and David Baltimore <sup>1,6\*</sup>

<sup>1</sup>Department of Biology and Biological Engineering, California Institute of Technology, Pasadena, CA, USA. <sup>2</sup>Center of Systems Medicine, Institute of Basic Medical Sciences, Chinese Academy of Medical Sciences and Peking Union Medical College, Beijing, China. <sup>3</sup>Suzhou Institute of Systems Medicine, Suzhou, China. <sup>4</sup>Division of Chemistry and Chemical Engineering, California Institute of Technology, Pasadena, CA, USA. <sup>5</sup>Department of Molecular and Medical Pharmacology, David Geffen School of Medicine, University of California, Los Angeles, Los Angeles, CA, USA. <sup>6</sup>Parker Institute for Cancer Immunotherapy (PICI), University of California, Los Angeles and California Institute of Technology, Pasadena, CA, USA. <sup>7</sup>Division of Hematology & Oncology, David Geffen School of Medicine, University of California, Los Angeles, Los Angeles, CA, USA. <sup>8</sup>Department of Surgery, David Geffen School of Medicine, University of California, Los Angeles, Los Angeles, CA, USA. \*e-mail: [alokvj@caltech.edu](mailto:alokvj@caltech.edu); [baltimo@caltech.edu](mailto:baltimo@caltech.edu)

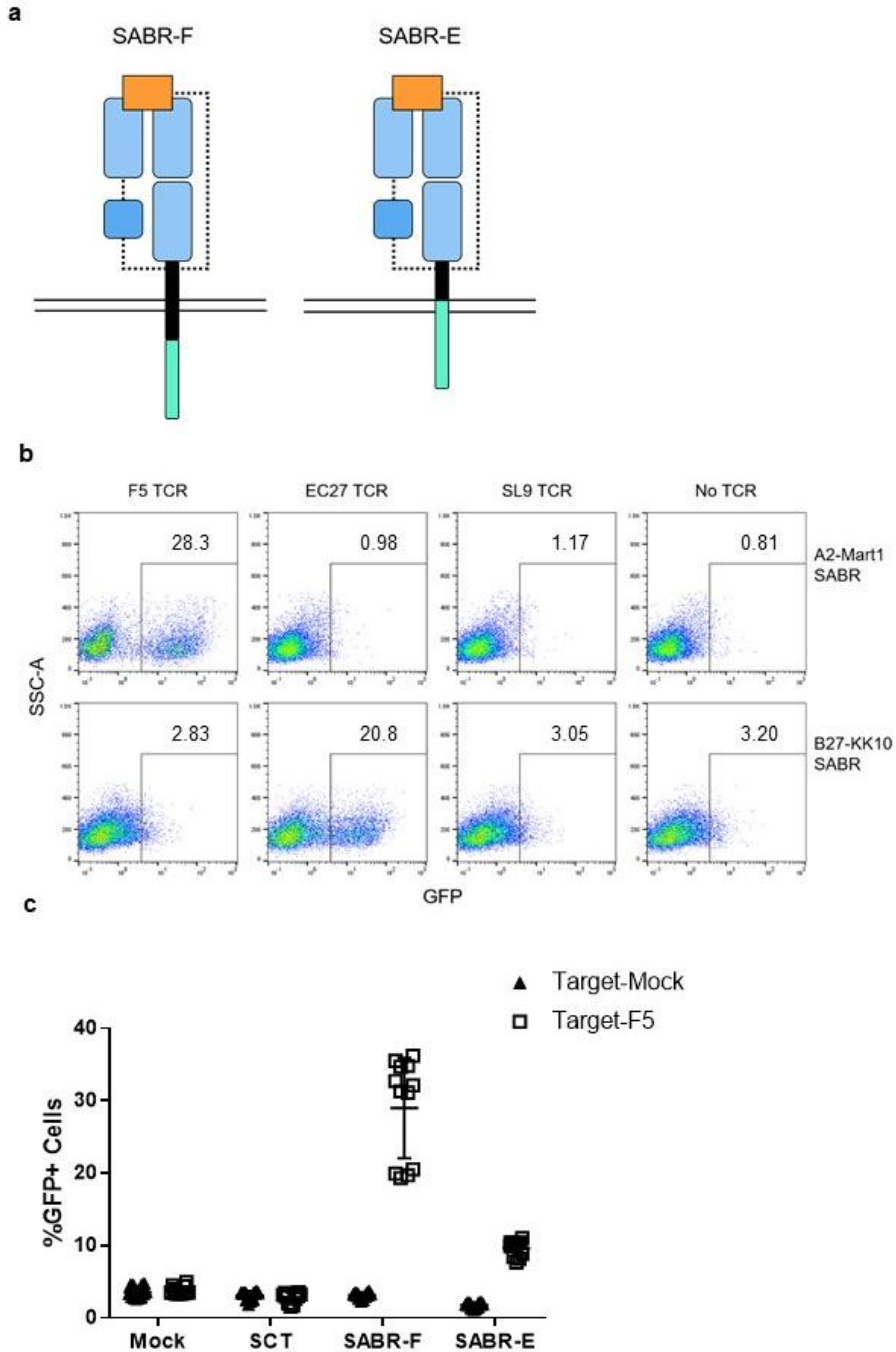

**Supplementary Figure 1**

**Variants of SABR constructs.**

**a.** Schematics showing the SABR-F and SABR-E constructs. SABR-F contains the transmembrane domain from HLA (black rectangle), whereas SABR-E contains the transmembrane domain from CD3 $\zeta$  (teal rectangle). The two horizontal lines indicate two leaflets of the plasma membrane. **b.** Representative flow cytometry plots showing GFP expression in coculture assays from Fig 1b. The experiments were performed at  $n = 3$  biologically independent cell culture replicates. **c.** GFP expression in coculture assays comparing SABR-F and SABR-E. The lines and error bars indicate mean  $\pm$  s.d. from  $n = 12$  biologically independent cell culture replicates.

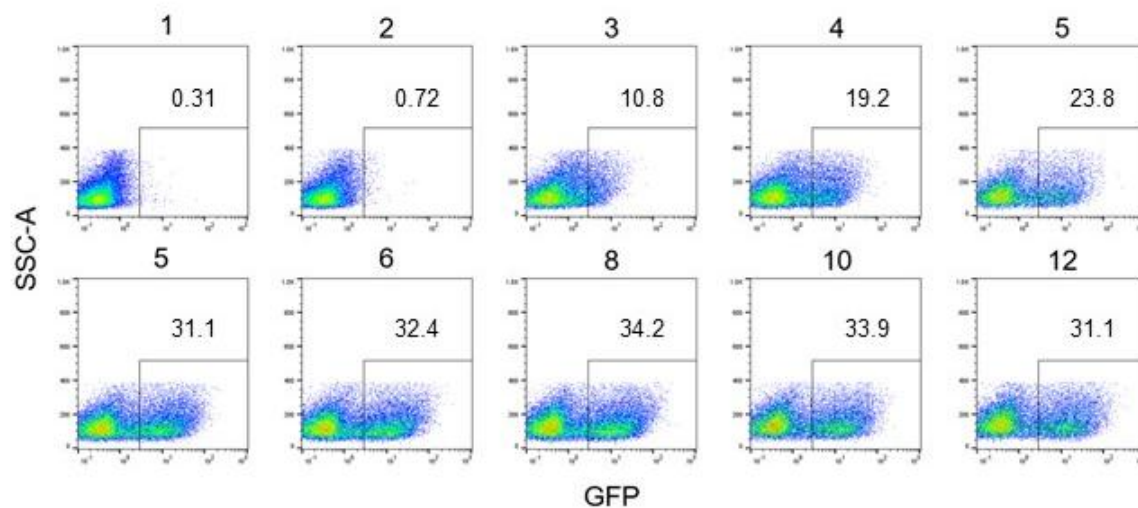

## Supplementary Figure 2

### Time course of GFP expression induced by SABRs.

Representative flow cytometry plots from the F5+A2-MART1 experiment enumerated in Fig. 1e are shown. The rectangle in the right bottom corners shows the gate for counting GFP<sup>+</sup> cells. The time at which each sample was collected is shown as hours. The frequency of cells in the GFP<sup>+</sup> gate is indicated as a percentage.

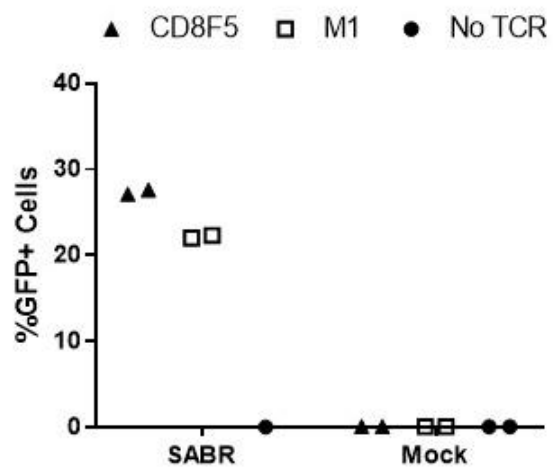

**Supplementary Figure 3**

**Recognition of low-affinity TCRs by SABRs.**

GFP expression in coculture assays using F5 and M1 TCRs with A2-MART1-SABR. The dots indicate individual values from  $n = 2$  biologically independent cell culture replicates.

**a**

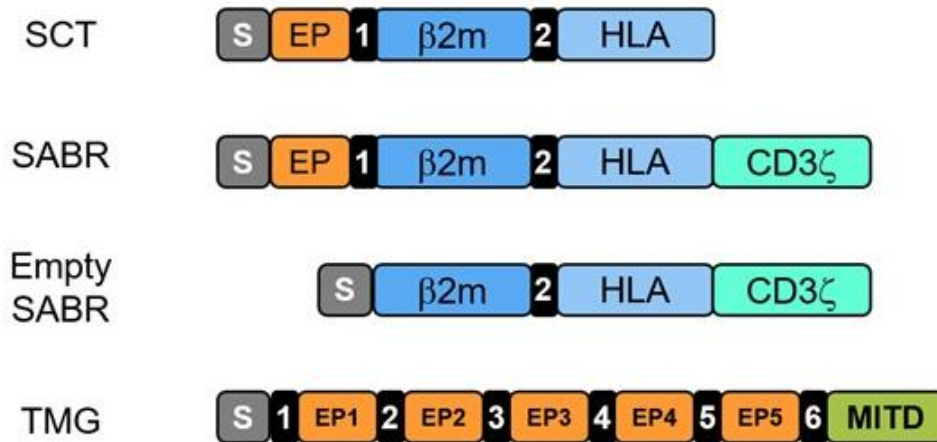

**b**

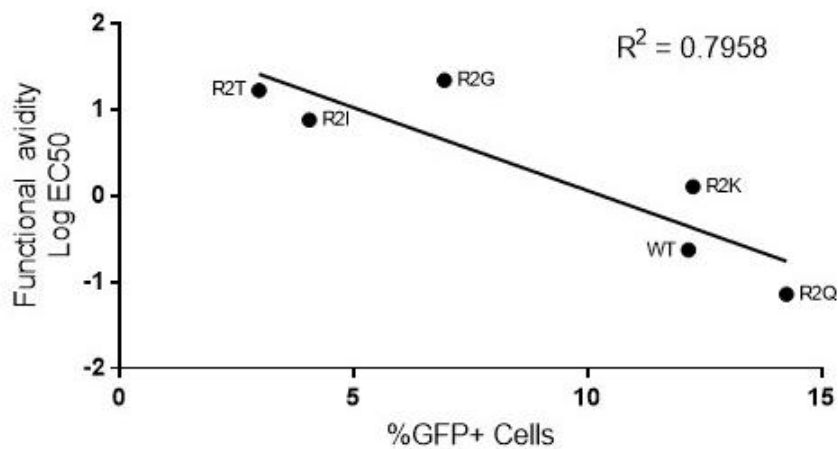

**Supplementary Figure 4**

**Empty SABR vector constructs and recognition of low-affinity pMHC–TCR interactions.**

**a.** Schematic showing SCT, SABRs, empty SABRs, and TMGs. EP, epitope; S, signal sequence; MITD, MHC class I trafficking signal; numbers 1–6 indicate Gly–Ser linkers. **b.** Correlation of functional avidity of interaction of EC27 TCR with variants of KK10 peptides with their ability to initiate signal through SABRs. The indicated peptides are variants of the KK10 epitope. R2T, KTWIILGLNK; R2I, KIWIIILGLNK; R2G, KGWIIILGLNK; R2K, KKWIIILGLNK; WT, KRWIIILGLNK; R2Q, KQWIIILGLNK.

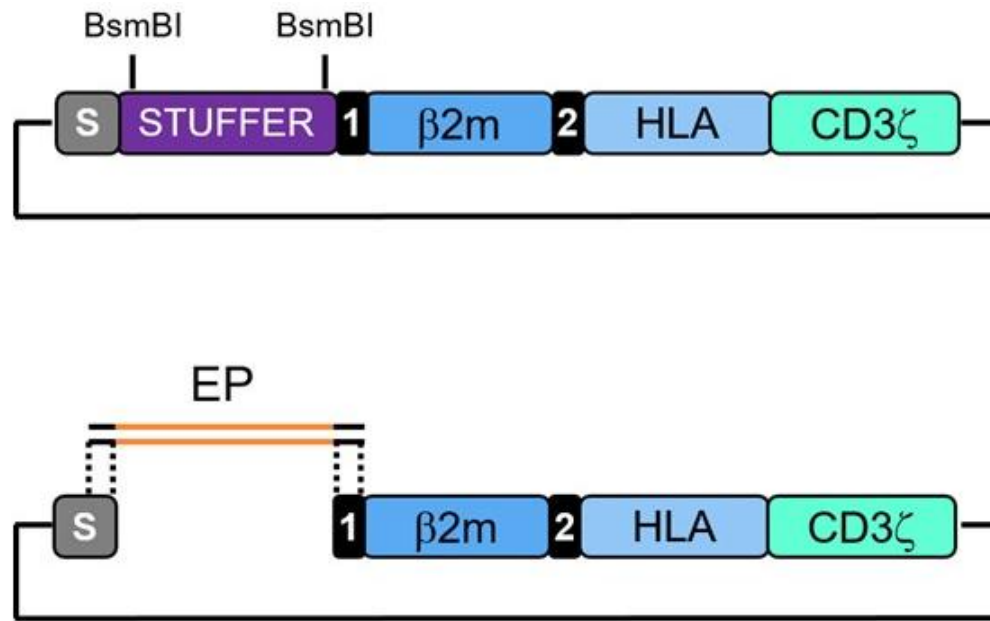

**Supplementary Figure 5**

**Strategy to clone custom oligonucleotides into SABR vectors.**

SABR vector constructs with a stuffer fragment showing BsmBI sites (top), and cloning strategy using double-stranded oligonucleotides with encoding the epitope flanked by overlaps.

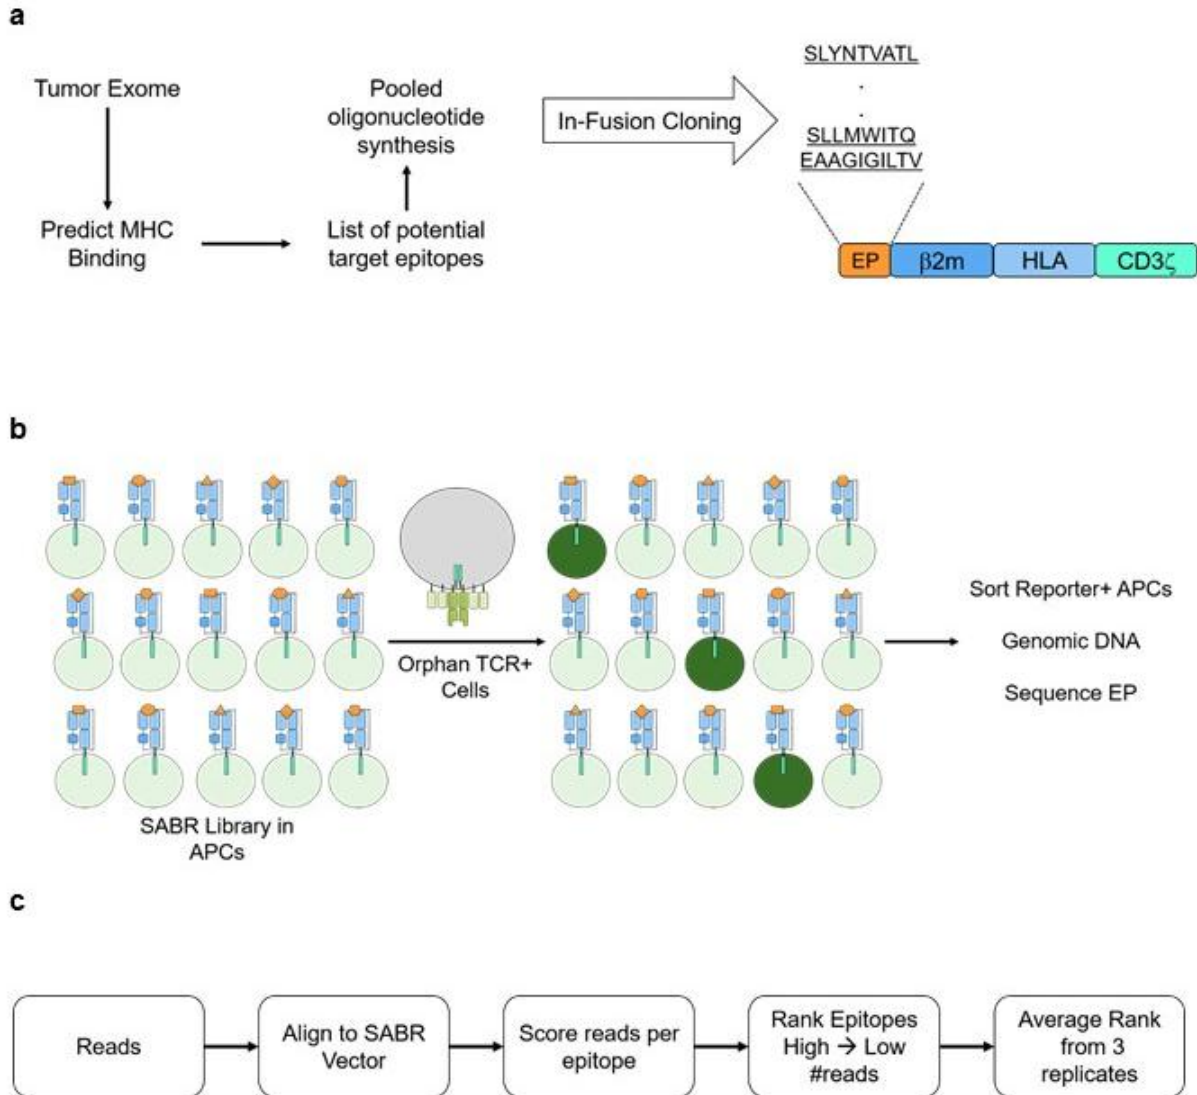

**Supplementary Figure 6**

**SABR library screen for antigen discovery.**

**a.** Schematic showing the pipeline to construct custom SABR libraries. EP, epitope. The left panel shows the procedure to obtain and synthesize a list of epitopes. The right panel shows the schematic of the SABR library. **b.** Schematic showing coculture experiment to select cells from SABR library that are recognized by an orphan TCR. Left panel shows a SABR library presenting numerous unique epitopes. The middle panel shows antigen-presenting cells (APCs) showing reporter expression induced by SABRs presenting the cognate epitope for the orphan TCR. Right panel shows processing of the selected cells. **c.** Flowchart showing the computational analysis pipeline.





Average ranks for all the USP7-derived epitopes in the NeoAg-SABR library. The data are averaged from three biologically independent cell culture replicates.

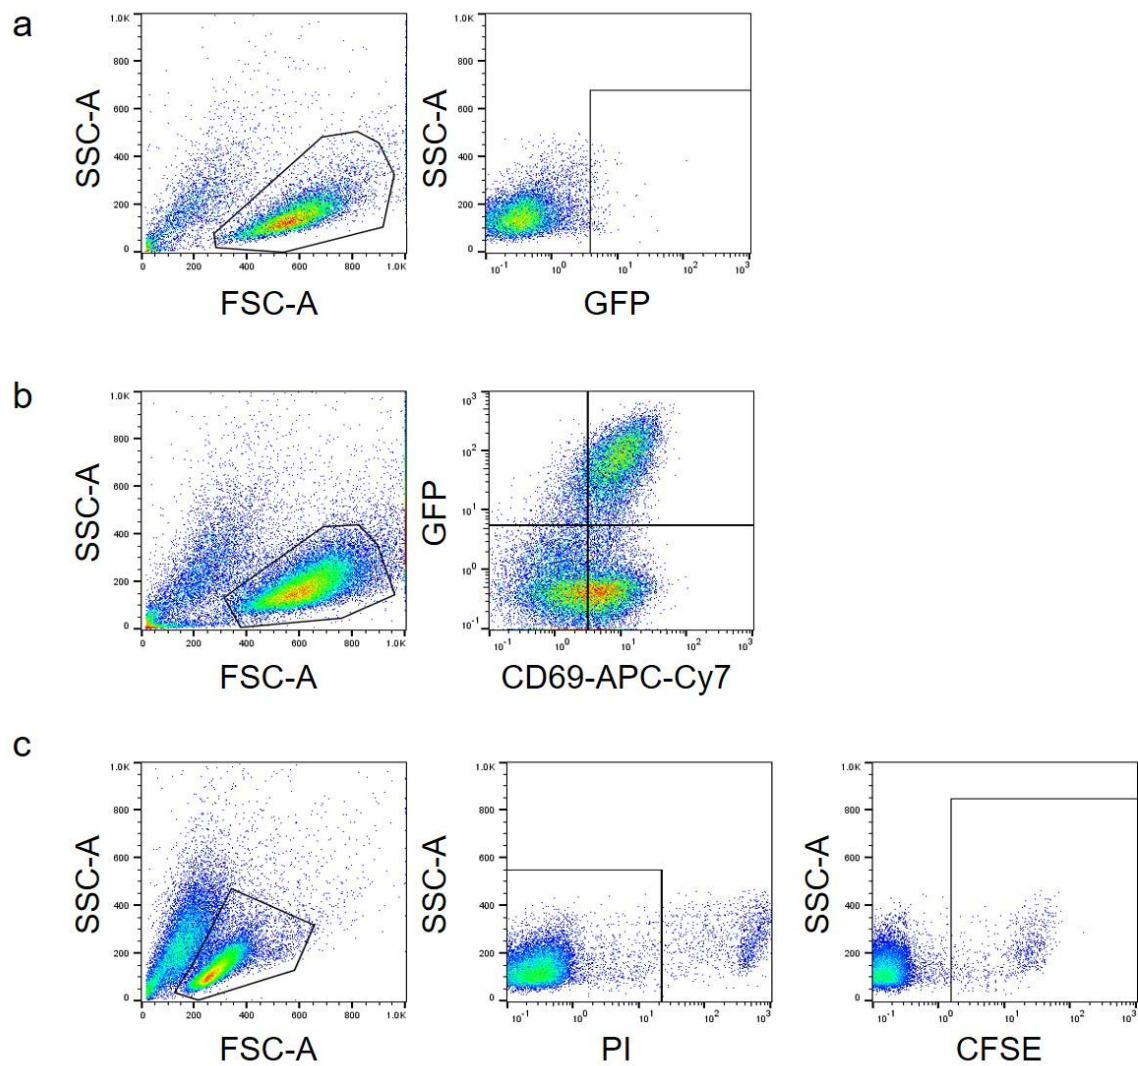

**Supplementary Figure 9**

**Gating strategy used in flow cytometry.**

**a.** Gating strategy used in coculture assays to measure GFP expression. **b.** Gating strategy used in coculture assays to measure GFP and CD69 expression. **c.** Gating strategy used in cytotoxicity assays.

| <b>Product Name</b>                                                 | <b>Manufacturer / Source</b>                        | <b>Cat. No</b> |
|---------------------------------------------------------------------|-----------------------------------------------------|----------------|
| Jurkat Cells, Clone E6-1                                            | ATCC, Manassas, VA                                  | TIB-152        |
| NFAT-GFP-Jurkat Cells                                               | Provided by Arthur Weiss and Yvonne Chen            | N/A            |
| K562-A2.1+ cells                                                    | ATCC, Manassas, VA                                  | CCL-243        |
| GXR-B27+ cells                                                      | Provided by Bruce D. Walker                         | N/A            |
| Primary T Cells                                                     | UCLA, CFAR Virology Core                            | N/A            |
| HEK-293T Cells                                                      | ATCC, Manassas, VA                                  | CRL-3216       |
| RPMI 1640, 1X with L-glutamine                                      | Corning™, Corning, NY                               | 10-040-CV      |
| 10% Fetal Bovine Serum                                              | Corning™, Corning, NY                               | 35-015-CV      |
| Penicillin-Streptomycin Solution,<br>100X                           | Corning™, Corning, NY                               | 30-002-CI      |
| G-418 Sulfate                                                       | Corning™, Corning, NY                               | 30-234-CI      |
| Immunocult™ CD3/28 T Cell<br>Activator                              | StemCell Technologies™, Vancouver,<br>Canada        | 10991          |
| Human IL-2 IS, premium grade                                        | MACS Miltenyi Biotec, Bergisch Gladbach,<br>Germany | 130-097-746    |
| All indicated peptides                                              | Synthesized by Pierce Thermo Fisher                 | N/A            |
| DMEM, 1X with L-Glutamine,<br>4.5g/L Glucose and Sodium<br>Pyruvate | Corning™, Corning, NY                               | 10-013-CV      |
| Clontech In-Fusion® HD Cloning<br>Kit                               | Clontech, Takara Bio USA, Mountain View,<br>CA      | 639650         |
| BsmBI                                                               | New England BioLabs®, Inc, Ipswich, MA              | R0580S         |
| Clontech Stellar™ Competent<br>Cells                                | Clontech, Takara Bio USA, Mountain View,<br>CA      | 636763         |

|                                                                        |                                                                      |             |
|------------------------------------------------------------------------|----------------------------------------------------------------------|-------------|
| Zyppy™ Plasmid Miniprep Kit                                            | Zymo Research, Irvine, CA                                            | D4036       |
| Carbenicillin (disodium)                                               | Gold Biotechnology®, Saint Louis, MO                                 | C-103-SL10  |
| NucleoBond® Xtra Maxi EF Kit                                           | Clontech, Takara Bio USA, Mountain View, CA                          | 740424.50   |
| TransIT®-293 Transfection Reagent                                      | Mirus® Bio, LLC Madison, WI                                          | MIR 2704    |
| RetroNectin                                                            | Takara Bio Inc, CA                                                   | T100B       |
| Gibco™ Opti-MEM™ I Reduced Serum Medium                                | Life Technologies, Thermo Fisher Scientific, Waltham, MA             | 31985-062   |
| Millex®-HV Syringe Filter Unit, 0.45 µm, PVDF, 33 mm, gamma sterilized | EMD Millipore, Burlington, MA                                        | SLHV033RS   |
| MACSQuant® Analyzer 10                                                 | MACS Miltenyi Biotec, Bergisch Gladbach, Germany                     | 130-096-343 |
| APC/Cy7 anti-human CD69<br>Clone: FN50                                 | BioLegend®, San Diego, CA                                            | 310913      |
| BD FACSort™                                                            | Becton Dickinson, Franklin Lakes, NJ                                 |             |
| CFSE Cell Division Tracker Kit                                         | BioLegend®, San Diego, CA                                            | 423801      |
| Invitrogen™ PureLink™ Genomic DNA Mini Kit                             | Invitrogen™ Life Technologies, Thermo Fisher Scientific, Waltham, MA | K182001     |
| KOD DNA Polymerase                                                     | EMD Millipore, Burlington, MA                                        | 71085       |
| Macherey-Nagel NucleoSpin® Gel and PCR Purification Kit                | Clontech, Takara Bio USA, Mountain View, CA                          | 740609.250  |
| 2100 Bioanalyzer Instrument                                            | Agilent, Santa Clara, CA                                             | G2939BA     |
| Illumina® HiSeq 2500 Sequencing                                        | Illumina® San Diego, CA                                              | SY-401-2501 |

|                                                                   |                                 |     |
|-------------------------------------------------------------------|---------------------------------|-----|
| System                                                            |                                 |     |
| TreeStar FlowJo® Flow<br>Cytometric Data Analysis<br>Software v10 | FlowJo, LLC Ashland, Oregon     | N/A |
| GraphPad Prism v7                                                 | GraphPad, San Diego, California | N/A |

**Supplementary Table 1:**

Reagents used in this study and their ordering information.

| Primer name                  | Sequence (5'-3')                                                                    | Purpose                    |
|------------------------------|-------------------------------------------------------------------------------------|----------------------------|
| SS-Fwd                       | AGCTCCTCGAGATGGCGACGGGTCAAG                                                         | SABR cloning               |
| CD28-Overlap-<br>HLA-A2-Rev  | CCACCGCGAGACCTCTTGCTCCGCACTTTACA<br>AGCTGTGAGAGACACA                                | SABR cloning               |
| CD28-Overlap-<br>HLA-B27-Rev | CCACCGCGAGACCTCTTGCTCCGAGCTGTGAG<br>AGACACATCAGAGC                                  | SABR cloning               |
| CD28Intracell-<br>Fwd        | CGGAGCAAGAGGTCTCGC                                                                  | SABR cloning               |
| XhoI-CD3z-Rev                | TTGACCTCGAGTCATCTTGGTGGCAGAGCC                                                      | SABR cloning               |
| Oligo-Insert-Fwd             | CAGGAGGGCTCGGCA                                                                     | Cloning epitopes in SABRs  |
| Oligo-Insert-Rev             | GGACCTCCGCATCC                                                                      | Cloning epitopes in SABRs  |
| Epitope-Oligo                | CAGGAGGGCTCGGCA NNN...NNN<br>GGATGCGGAGGGTCC                                        | Cloning epitopes in SABRs  |
| TruSeq-Univ-<br>SCTfixed-F   | AATGATACGGCGACCACCGAGATCTACACTCT<br>TTCCCTACACGACGCTCTTCCGATCTGGCCTGC<br>TTTGTTTGCC | High throughput sequencing |
| TruSeq-Read2-<br>SCTfixed-R  | GTGACTGGAGTTCAGACGTGTGCTCTTCCGAT<br>CTCCTCCACCAACGCTACCTC                           | High throughput sequencing |
| Truseq-Adapter-<br>Index     | CAAGCAGAAGACGGCATACGAGAT [index]<br>GTGACTGGAGTTCAGACGTGTGCTCTTCCGAT<br>CT          | High throughput sequencing |

## **Supplementary Table 2: Primers used in this study**

In the Epitope-Oligo, NNN...NNN indicates back-translated epitope

In the Truseq-Adapter-Index, [index] indicates the 6-nucleotide unique index used for sequencing.
