# Supplementary material for: T cell antigen discovery via signaling and antigen-presenting bifunctional receptors
Source: Springer Nature journal article supplement (doi:10.1038/s41592-018-0304-8), 2019-01-28
Supplement: MOESM8 [file 41592_2018_304_MOESM8_ESM.xlsx]

## Sheet: Fig 3
		Fig 3b
			Mock								SCT								SABR
		Target- Mock-PBMC	100.421	100.622	103.852	95.1051	113.44	86.9717	90.1377	109.451	96.8881	93.1203	87.5357	100.219	90.3277	95.1401	90.4227	96.0266	87.2666	92.0101	84.979	94.5669	110.717	98.7494	91.1192	94.0003
		Target- F5-PBMC	120.14	119.702	84.8365	75.3221	106.256	116.137	87.6227	89.984	92.1183	97.1259	94.1422	86.4848	95.3224	88.9573	89.7786	89.753	44.8594	54.2277	55.9387	51.2023	68.9381	67.6291	72.48	69.2974
		Fig 3c
			Mock				SCT				SABR
		Target- Mock-Jurkat	109.87	104.242	109.787	76.1016	114.921	116.349	107.042	103.143	105.559	92.464	81.3727	96.1153
		Target- F5-Jurkat	98.0062	102.591	113.36	86.0433	70.5832	73.9738	76.9592	57.5115	24.0751	31.9011	14.5005	11.5364
		Fig 3e
		log [Mart1]	NFAT-GFP-Jurkat + SABR + [Mart1]			NFAT-GFP-Jurkat + F5 TCR
		1	100.243	99.8785	99.8785	102.349	91.3177	106.333
		0	86.7558	87.1203	86.3912	93.4627	93.1563	99.8979
		-1	56.5006	57.9587	57.9587	91.0112	86.1083	92.8499
		-2	20.5225	20.0121	22.9283	66.8029	64.6578	71.7058
		-3	8.45687	8.49332	8.16525	30.95	29.6323	36.7722
		-4	7.50911	7.98299	8.52977	9.49949	10.3575	13.7896
		-5	7.72783	7.98299	7.94654	6.00613	6.52707	8.12053
		-6	8.16525	8.2017	8.42041	5.45455	5.94484	8.58018
		-7	8.09234	8.82138	7.91008	5.57712	6.00613	5.08682
